# Supplementary figures and images for: Minimal non-abelian nodal braiding in ideal metamaterials
Source: Research Square preprint supplement (doi:10.21203/rs.3.rs-1303568/v1), 2022-02-17

**a**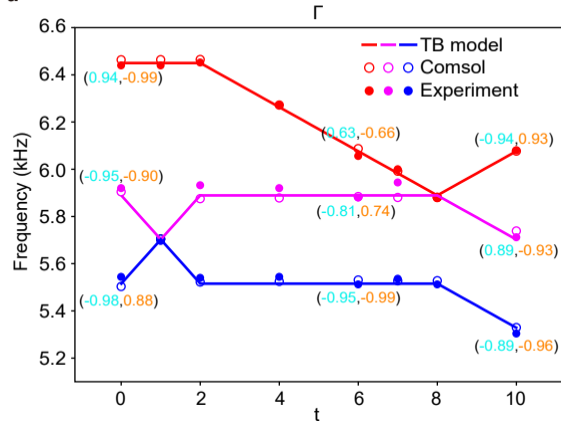**b**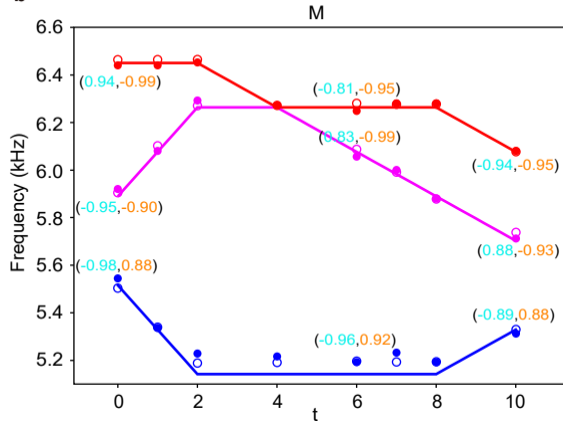

Supplement: Supplementary file 1 [file cde5b877a8e333dbb1ba53c6.pdf]
